# Supplementary material for: The enol of isobutyric acid
Source: Royal Society of Chemistry journal article supplement (doi:10.1039/d4cc01140f), 2024-01-01
Supplement: d4cc01140f1.pdf [file d4cc01140f1.pdf]

## The Enol of Isobutyric Acid

Akkad Danho, Artur Mardyukov, and Peter R. Schreiner\*

### Table of Contents

|                                      |    |
|--------------------------------------|----|
| <b>Experimental Procedures</b> ..... | 2  |
| <b>Synthesis</b> .....               | 3  |
| <b>Figure S1:</b> .....              | 6  |
| <b>Figure S2:</b> .....              | 7  |
| <b>Figure S3:</b> .....              | 7  |
| <b>Figure S4:</b> .....              | 8  |
| <b>Table S1:</b> .....               | 9  |
| <b>Table S2:</b> .....               | 10 |
| <b>Table S3:</b> .....               | 11 |
| <b>References</b> .....              | 12 |
| <b>Optimized structures</b> .....    | 13 |

## Experimental Procedures

**Matrix Apparatus Design.** A Sumitomo cryostat system consisting of an RDK 408D2 closed-cycle refrigerator cold head and an F-70 compressor unit was used for matrix isolation experiments. A polished CsI window was mounted in the cold head sample holder. The sample holder, connected with silicon diodes for temperature measurements, was covered by a vacuum shroud, which was equipped with KBr windows to allow for IR measurements. In some experiments BaF<sub>2</sub> windows were used due to their higher transparency when measuring UV/vis spectra. The sample and the host gas (Ar, purity of 99.999%) were co-deposited at 3.5 K. All spectral data were collected at 3.5 K. The pyrolysis zone was equipped with a heatable 90 mm long quartz tube (inner diameter 7 mm), controlled by a Ni/CrNi thermocouple. The travel distance of the sample from the pyrolysis zone to the matrix was ~45 mm. Ar was stored in a 2 L gas balloon, which was evacuated and filled three times before every experiment. The sample was evaporated from a Schlenk tube at 80 °C (water) and reduced pressure ( $\sim 3 \times 10^{-6}$  mbar) and co-deposited with a high excess of argon on both sides of the matrix window in the dark (preventing unwanted photochemistry) at a rate of  $\sim 1$  mbar min<sup>-1</sup>, based on the pressure inside the Ar balloon. Pyrolyses were carried out at 750 °C. IR spectra were recorded between 7000 and 350 cm<sup>-1</sup> with a resolution of 0.7 cm<sup>-1</sup> with a Bruker Vertex 70 FTIR spectrometer. A spectrum of the cold matrix window before deposition was used as background spectrum for the subsequent IR measurements. UV/vis spectra were recorded between 190 and 800 nm with a resolution of 1 nm with a Jasco V-760 spectrophotometer. A high-pressure-mercury lamp equipped with a monochromator (LOT Quantum Design) or a low-pressure-mercury lamp (Grüntzel) fitted with a Vycor filter were used for irradiation of the matrix during photochemical experiments.

**Computations.** All DFT computations were performed with the Gaussian 16,<sup>1</sup> Revision C.01 (full citations for electronic structure codes are given at the end of this document) at the B3LYP/def2-TZVP<sup>2-3</sup> level of theory. The keywords Opt and Freq=NoRaman were used for the characterization of minima on the PES. For transition structures the keyword Opt=(ts,tight,calcfc,noeigen) was used. UV/Vis absorptions were computed by using the keyword td(50-50,nstates=10).

## Synthesis

### Diethyl dimethylmalonate-d<sub>6</sub>

To a solution of 0.550 g (3.43 mmol, 1.00 equiv) diethyl malonate in 7 mL anhydrous *N,N*-dimethylformamide 1.42 g (10.27 mmol, 3.33 equiv) K<sub>2</sub>CO<sub>3</sub> was added. The reaction was stirred at room temperature for 1 h and 0.440 mL (1.000, 7.03 mmol, 2.05 equiv) iodomethane-d<sub>3</sub> was added and the reaction mixture was stirred at room temperature for 4 d. The remaining salts were filtered and the yellow solution was quenched with 6 mL (5% wt) Na<sub>2</sub>S<sub>2</sub>O<sub>3</sub>-solution and extracted with ethyl acetate. The combined organic layers were dried with MgSO<sub>4</sub>, filtered, and the solvent was removed under reduced pressure, giving 0.454 g (2.32 mmol) of diethyl dimethylmalonate-d<sub>6</sub> in 68% yield. The residue contained DMF, yet proved inconsequential for the subsequent step, allowing for the utilization of the crude product without additional purification.

<sup>1</sup>H-NMR (400 MHz, CDCl<sub>3</sub>): δ/ppm = 4.18 (q, *J* = 8.0 Hz, 4H, 2 CH<sub>2</sub>), 1.25 (t, *J* = 8 Hz, 6H, 2 CH<sub>3</sub>).

<sup>13</sup>C-NMR (100 MHz, CDCl<sub>3</sub>): δ/ppm = 173.1, 170.3, 61.5, 61.3, 46.1, 14.2, 14.2.

HRMS: *m/z* = 217.1316 [M+Na]<sup>+</sup>, 217.1317 (calc).

### Dimethylmalonic acid-d<sub>6</sub>

0.302 g (1.57 mmol, 1.00 equiv) of crude diethyl dimethylmalonate-d<sub>6</sub> and 0.264 g (4.71 mmol, 3.00 equiv) KOH were dissolved in 2 mL H<sub>2</sub>O and the reaction mixture was refluxed for 3 h. After cooling to room temperature the reaction mixture was acidified with conc. HCl-solution to a pH of 2 and extracted with acetone. The combined organic layers were dried with MgSO<sub>4</sub>, filtered, and the solvent was removed under reduced pressure, giving 0.180 g (1.30 mmol) of dimethylmalonic acid-d<sub>6</sub> in 84 % yield.

<sup>1</sup>H-NMR (400 MHz, CD<sub>3</sub>OD): δ/ppm = /.

<sup>13</sup>C-NMR (100 MHz, CD<sub>3</sub>OD): δ/ppm = 177.0, 50.3, 22.6.

HRMS: *m/z* = 161.0695 [M+Na]<sup>+</sup>, 161.0691 (calc).

# Diethyl dimethylmalonate-d<sub>6</sub>

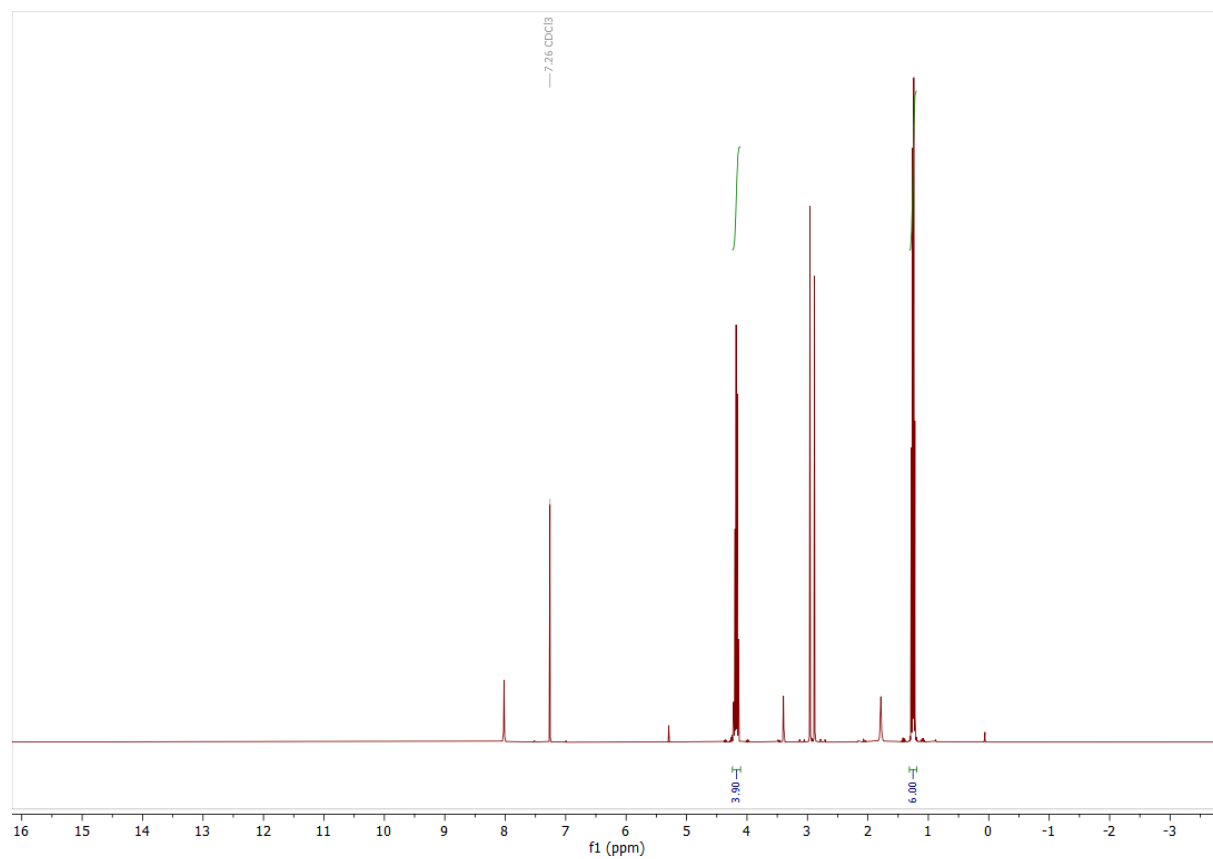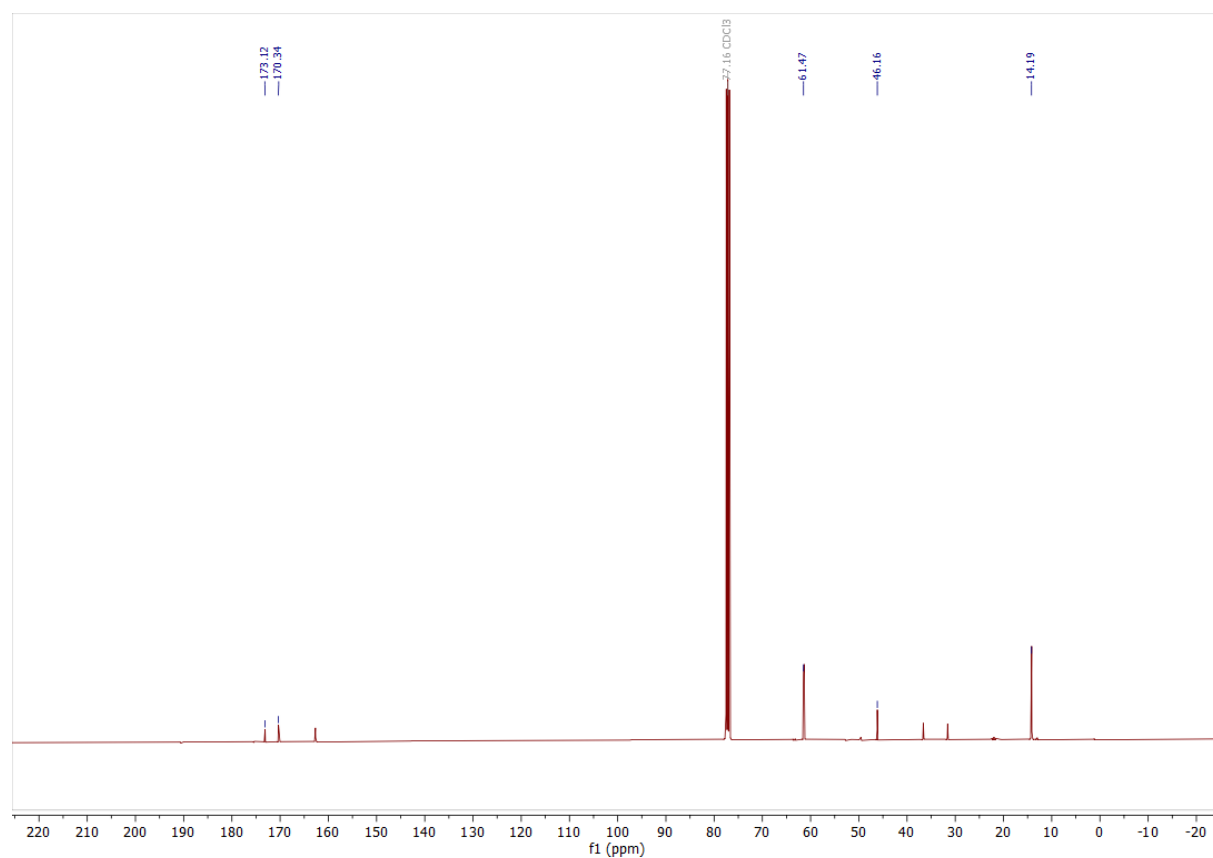

# Dimethylmalonic acid-d<sub>6</sub>

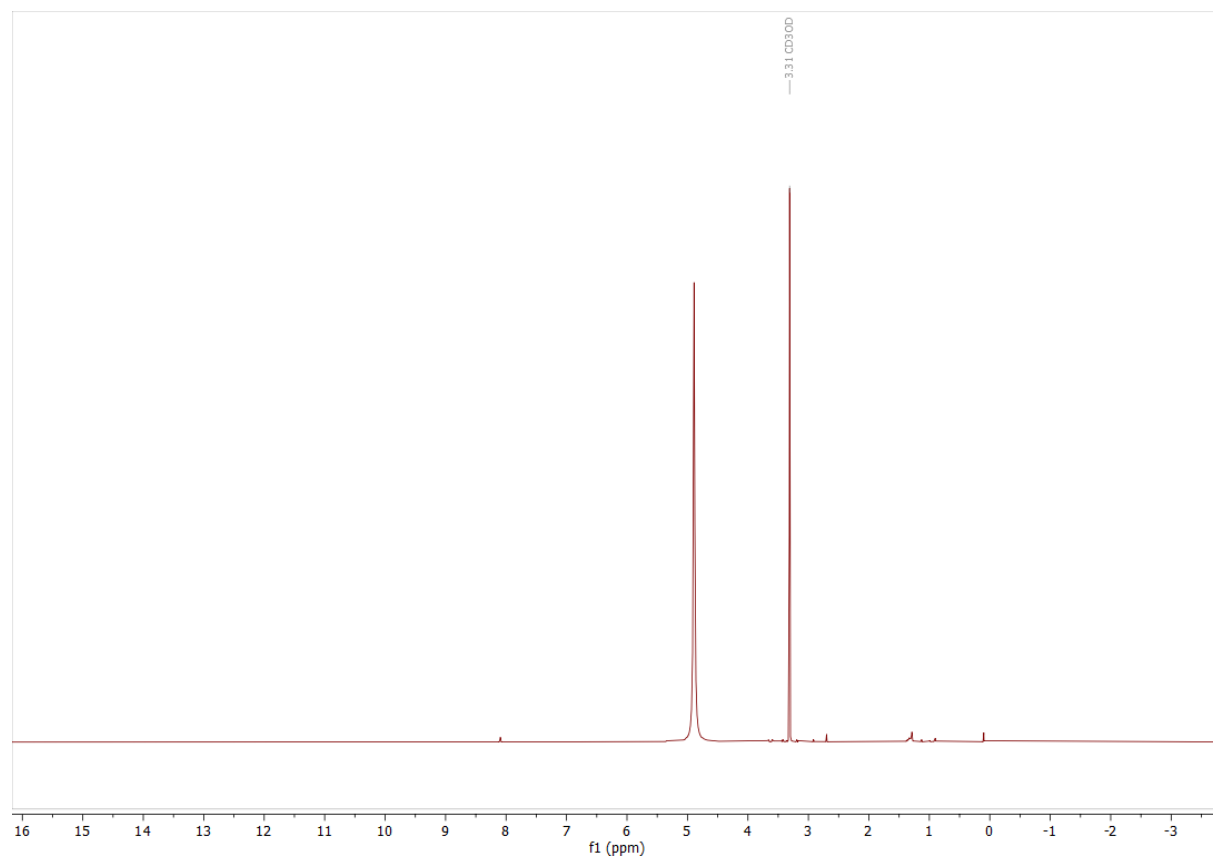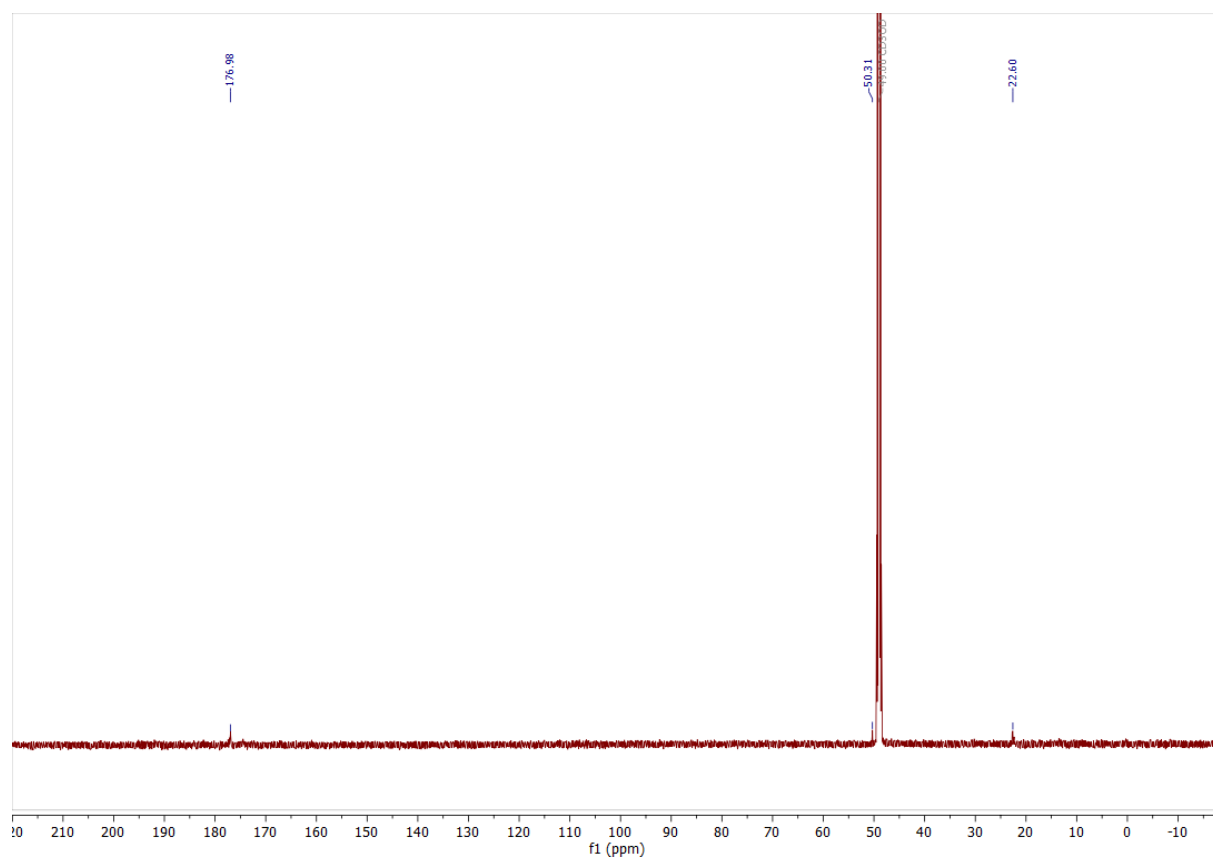

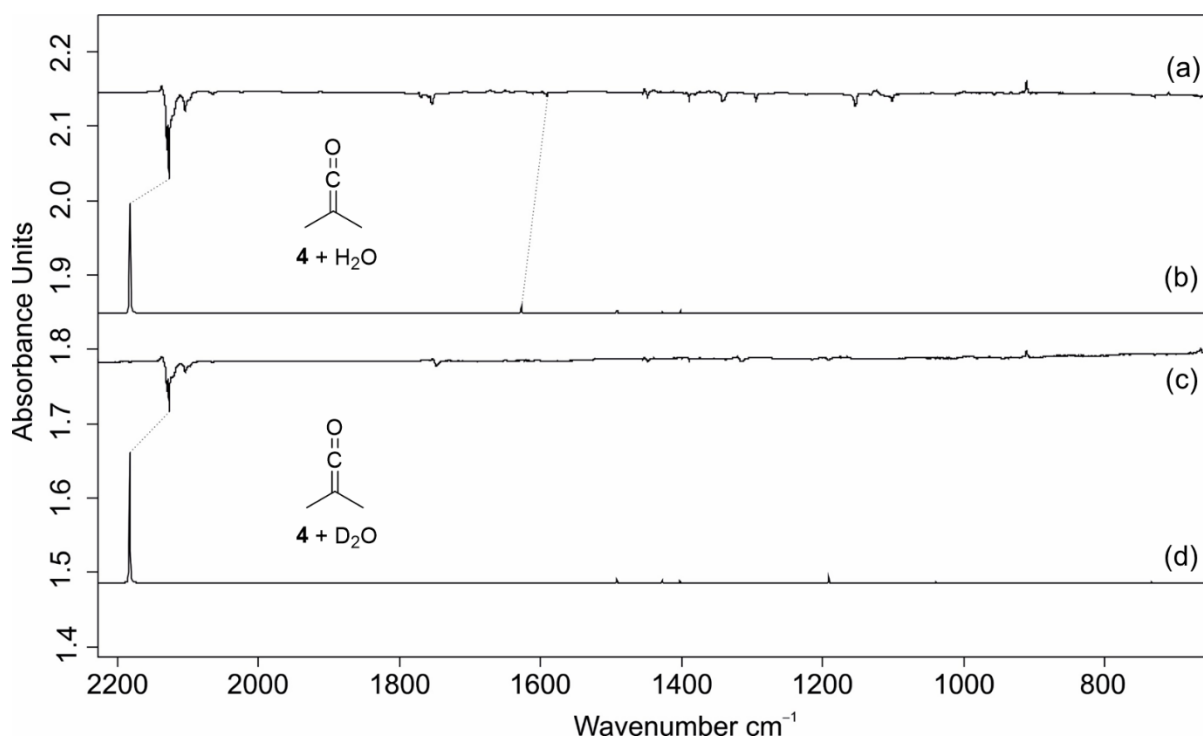

**Figure S1:** IR spectra showing the pyrolysis product of **1** with subsequent trapping in an argon matrix at 3.5 K (a) IR difference spectra showing the photochemistry of **4** after irradiation with  $\lambda = 254$  nm in argon at 3.5 K. Downward bands assigned to **4** disappear after 20 min irradiation time. (b) IR spectrum of **4** computed at B3LYP/def2-TZVP. (c) IR difference spectra showing the photochemistry of  $d_1$ -**4** after irradiation with  $\lambda = 254$  nm in argon at 3.5 K. Downward bands assigned to  $d_1$ -**4** disappear after 20 min irradiation time. (d) IR spectrum of  $d_1$ -**4** computed at B3LYP/def2-TZVP.

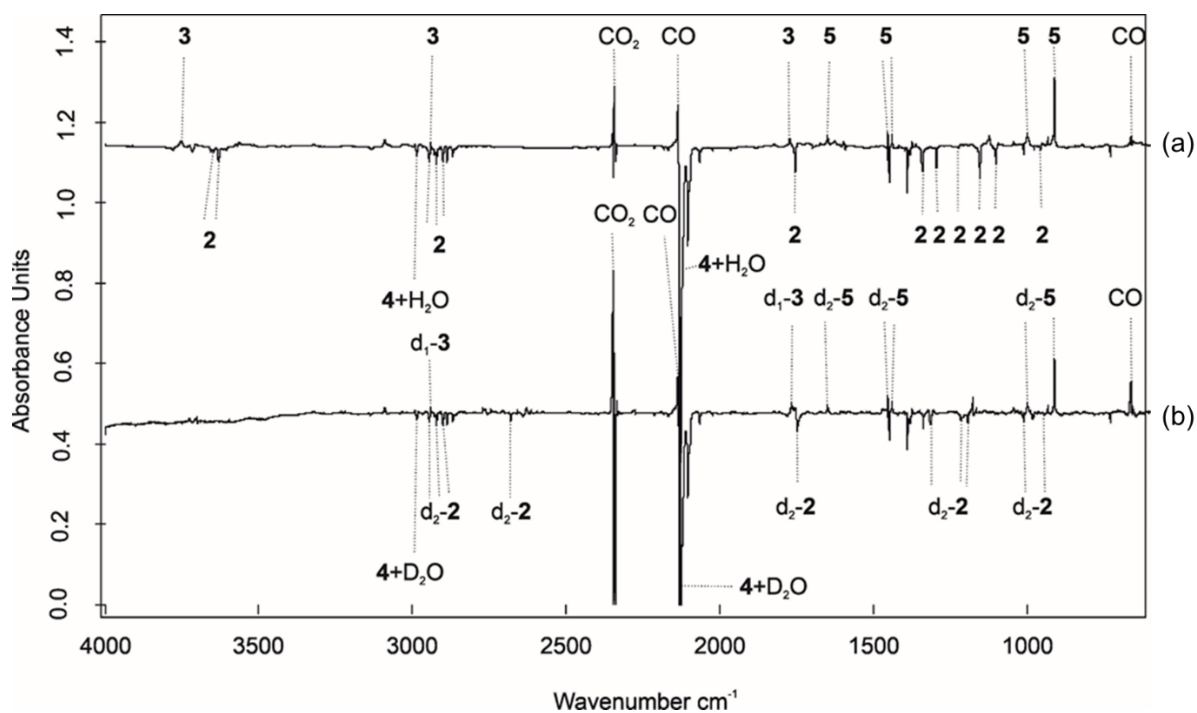

**Figure S2:** (a) IR difference spectra showing the photochemistry of **1** after irradiation with  $\lambda = 254$  nm in argon at 3.5 K. (b) IR difference spectra showing the photochemistry of  $\text{d}_2$ -**1** after irradiation with  $\lambda = 254$  nm in argon at 3.5 K.

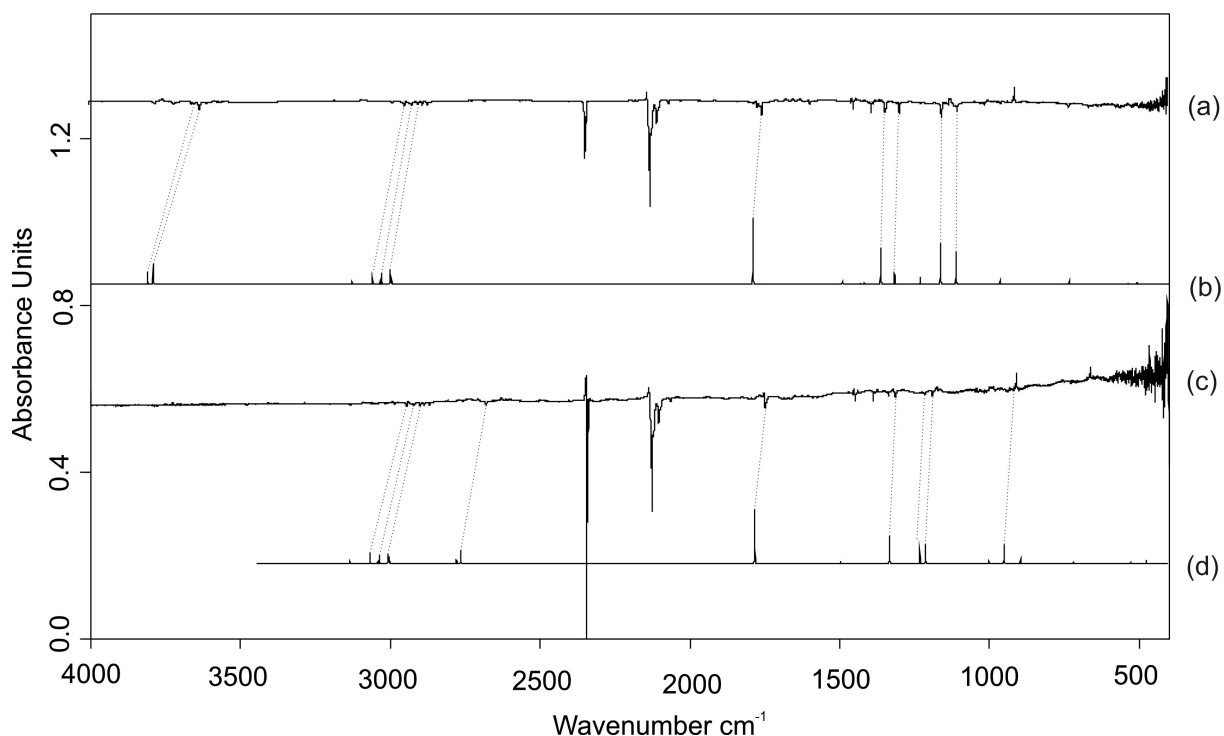

**Figure S3:** IR spectra showing the pyrolysis product of **1** with subsequent trapping in an argon matrix at 3.5 K. (a) IR difference spectra showing the photochemistry of **2** after irradiation with  $\lambda = 254$  nm in argon at 3.5 K. Downward bands assigned to **2** disappear while upward bands assigned **3** appear after 20 min irradiation time. (b) IR spectrum of **2** computed at B3LYP/def2-TZVP. (c) IR difference spectra showing the photochemistry of  $\text{d}_2$ -**2** after irradiation with  $\lambda = 254$  nm in argon at 3.5 K. Downward bands assigned to  $\text{d}_2$ -**2** disappear

while upward bands assigned to  $d_2$ -**3** appear after 20 min irradiation time. (d) IR spectrum of  $d_2$ -**2** computed at B3LYP/def2-TZVP.

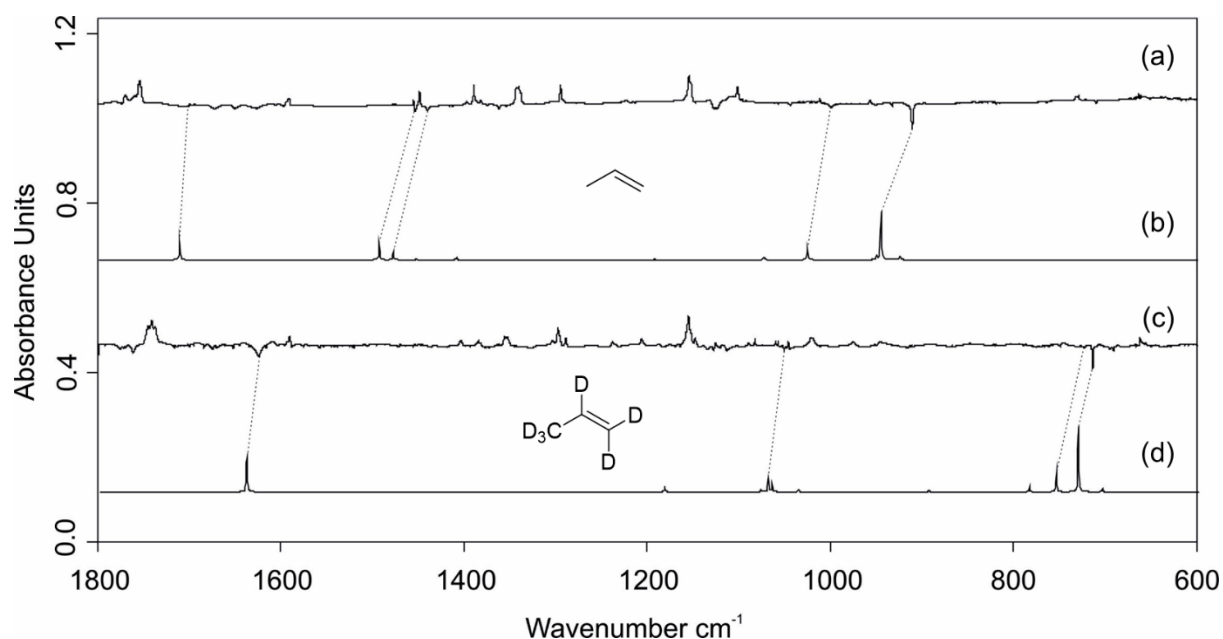

**Figure S4:** IR spectra showing the pyrolysis product of **1** with subsequent trapping in an argon matrix at 3.5 K. (a) IR difference spectra showing the photochemistry of **2** after irradiation with  $\lambda = 254$  nm in argon at 3.5 K. Downward bands assigned to propene appear after 20 min irradiation time. (b) IR spectrum of **2** computed at B3LYP/def2-TZVP. (c) IR difference spectra showing the photochemistry of  $d_6$ -**2** after irradiation with  $\lambda = 254$  nm in argon at 3.5 K. Downward bands assigned to  $d_6$ -propylene appear after 20 min irradiation time. (d) IR spectrum of  $d_2$ -**2** computed at B3LYP/def2-TZVP.



**Table S1:** Experimental (Ar matrix, 3.5 K) and computed IR frequencies of **2** and **d<sub>2</sub>-2** band origins in cm<sup>-1</sup>, computed intensities (km mol<sup>-1</sup>) in parantheses.

| Mode | <b>2</b><br>Computed <sup>a</sup> | <b>2</b> Ar<br>3.5 K <sup>b</sup> | <b>d<sub>2</sub>-2</b><br>Computed <sup>a</sup> | <b>d<sub>2</sub>-2</b> Ar<br>3.5 K <sup>b</sup> | Assignment                                  |
|------|-----------------------------------|-----------------------------------|-------------------------------------------------|-------------------------------------------------|---------------------------------------------|
| 1    | 3812 (46.9)                       | 3648 (w)                          | 3128 (10.5)                                     | 2986 (w)                                        | O–H stretching                              |
| 2    | 3792 (94.9)                       | 3630<br>(m)                       | 3062 (50.7)                                     | 2949<br>(m)                                     | O–H stretching                              |
| 3    | 3128 (10.4)                       | 2989 (w)                          | 3036 (17.7)                                     | 2924<br>(m)                                     | C–H (CH <sub>3</sub> ) stretching           |
| 4    | 3062 (49.5)                       | 2946<br>(m)                       | 3030 (45.2)                                     | 2903<br>(m)                                     | C–H (CH <sub>3</sub> ) stretching           |
| 5    | 3036 (17.7)                       | 2918<br>(m)                       | 3002 (67.4)                                     | 2889<br>(m)                                     | C–H (CH <sub>3</sub> ) stretching           |
| 6    | 3030 (45.2)                       | 2898<br>(m)                       | 2998 (41.7)                                     | 2871<br>(m)                                     | C–H (CH <sub>3</sub> ) stretching           |
| 7    | 3002 (68.1)                       | 2888<br>(m)                       | 2773 (27.2)                                     | -                                               | C–H (CH <sub>3</sub> ) stretching           |
| 8    | 2998 (41.0)                       | 2868<br>(m)                       | 2760 (61.7)                                     | 2680<br>(m)                                     | C–H (CH <sub>3</sub> ) asym.–<br>stretching |
| 9    | 1792 (254.3)                      | 1755 (s)                          | 1778 (250.8)                                    | 1750 (s)                                        | C=C stretching                              |
| 10   | 1509 (0.5)                        | -                                 | 1506 (2.1)                                      | -                                               | C–H (CH <sub>3</sub> ) bending              |
| 11   | 1494 (10.0)                       | 1453<br>(m)                       | 1493 (6.9)                                      | -                                               | C–H (CH <sub>3</sub> ) bending              |
| 12   | 1492 (13.2)                       | 1449<br>(m)                       | 1492 (13.0)                                     | 1448<br>(m)                                     | C–H (CH <sub>3</sub> ) twisting             |
| 13   | 1471 (2.5)                        | -                                 | 1471 (2.3)                                      | -                                               | C–H (CH <sub>3</sub> ) twisting             |
| 14   | 1432 (4.8)                        | -                                 | 1431 (1.4)                                      | -                                               | C–C stretching                              |
| 15   | 1420 (9.2)                        | 1387<br>(m)                       | 1416 (1.3)                                      | -                                               | C–C asym.–stretching                        |
| 16   | 1366 (151.0)                      | 1337 (s)                          | 1329 (132.3)                                    | 1315 (s)                                        | C–O stretching                              |
| 17   | 1319 (67.5)                       | 1294 (s)                          | 1228 (69.6)                                     | 1212<br>(m)                                     | O–H wagging                                 |
| 18   | 1234 (28.9)                       | 1227 (w)                          | 1209 (106.4)                                    | 1191 (s)                                        | O–H and C–C in pl.                          |
| 19   | 1166 (177.8)                      | 1156 (s)                          | 1099 (0.3)                                      | -                                               | O–H wagging                                 |
| 20   | 1115 (126.6)                      | 1101 (s)                          | 1011 (0.7)                                      | -                                               | C–CH <sub>3</sub> twisting                  |
| 21   | 1099 (0.5)                        | -                                 | 997 (19.8)                                      | 983 (w)                                         | C–H (CH <sub>3</sub> ) twisting             |
| 22   | 1011 (0.2)                        | -                                 | 985 (2.8)                                       | -                                               | C–H (CH <sub>3</sub> ) asym.–twisting       |
| 23   | 986 (2.3)                         | -                                 | 947 (105.5)                                     | 943 (w)                                         | C–CH <sub>3</sub> asym.–twisting            |
| 24   | 968 (22.8)                        | 958 (w)                           | 892 (35.6)                                      | -                                               | C–CH <sub>3</sub> asym.–twisting            |
| 25   | 737 (15.7)                        | 734 (w)                           | 717 (10.7)                                      | -                                               | C–C and C–O stretching                      |
| 26   | 648 (3.2)                         | -                                 | 645 (4.9)                                       | -                                               | OCO in pl. def.                             |
| 27   | 540 (5.5)                         | -                                 | 526 (6.6)                                       | -                                               | C=C in pl. def.                             |
| 28   | 511 (14.3)                        | -                                 | 473 (15.7)                                      | -                                               | C–O wagging                                 |
| 29   | 359 (1.6)                         | -                                 | 355 (0.9)                                       | -                                               | C–CH <sub>3</sub> wagging                   |
| 30   | 329 (31.4)                        | -                                 | 311 (4.5)                                       | -                                               | O–H wagging                                 |
| 31   | 304 (3.1)                         | -                                 | 267 (5.0)                                       | -                                               | O–H wagging                                 |
| 32   | 273 (9.4)                         | -                                 | 253 (21.7)                                      | -                                               | C=C in pl. def.                             |
| 33   | 267 (118.5)                       | -                                 | 204 (35.2)                                      | -                                               | O–H wagging                                 |

|    |            |   |            |   |                            |
|----|------------|---|------------|---|----------------------------|
| 34 | 158 (8.0)  | - | 155 (4.3)  | - | C-CH <sub>3</sub> twisting |
| 35 | 126 (22.2) | - | 121 (15.3) | - | C-CH <sub>3</sub> twisting |
| 36 | 93 (30.0)  | - | 87 (34.5)  | - | C-CH <sub>3</sub> twisting |

<sup>a</sup> B3LYP/def2-TZVP, harmonic approximation, unscaled frequencies, intensities (in parentheses) in km mol<sup>-1</sup>. <sup>b</sup> Experiment: argon matrix, 3.5 K; approximate relative intensities (w: weak, m: medium, s: strong).

**Table S2:** Experimental (Ar matrix, 3.5 K) and computed IR frequencies of **4** + H<sub>2</sub>O and **4** + D<sub>2</sub>O band origins in cm<sup>-1</sup>, computed intensities (km mol<sup>-1</sup>) in parantheses.

| Mode | <b>4</b> + H <sub>2</sub> O | <b>4</b> Ar        | <b>4</b> + D <sub>2</sub> O | <b>4</b> + D <sub>2</sub> O Ar | Assignment                        |
|------|-----------------------------|--------------------|-----------------------------|--------------------------------|-----------------------------------|
|      | Computed <sup>a</sup>       | 3.5 K <sup>b</sup> | Computed <sup>a</sup>       | 3.5 K <sup>b</sup>             |                                   |
| 1    | 3052 (48.4)                 | -                  | 3052 (48.4)                 | -                              | C-H (CH <sub>3</sub> ) wagging    |
| 2    | 3012 (55.6)                 | -                  | 3012 (55.6)                 | -                              | C-H (CH <sub>3</sub> ) stretching |
| 3    | 2840 (45.4)                 | -                  | 2840 (45.3)                 | -                              | H-O asym.stretching               |
| 4    | 2183 (760.7)                | 2129 (s)           | 2182 (760.7)                | 2129 (s)                       | C=C stretching                    |
| 5    | 1192 (36.5)                 | -                  | 1191 (36.5)                 | -                              | O-H wagging                       |
| 6    | 240 (127.0)                 | -                  | 240 (127.1)                 | -                              | O-H rocking                       |

<sup>a</sup> B3LYP/def2-TZVP, harmonic approximation, unscaled frequencies, intensities (in parentheses) in km mol<sup>-1</sup>. <sup>b</sup> Experiment: argon matrix, 3.5 K; approximate relative intensities (w: weak, m: medium, s: strong).

**Table S3:** Experimental (Ar matrix, 3.5 K) and computed IR frequencies of **propylene** and **d<sub>6</sub>-propylene** band origins in cm<sup>-1</sup>, computed intensities (km mol<sup>-1</sup>) in parentheses.

| Mode | propylene<br>Computed <sup>a</sup> | propylene<br>Ar, 3.5 K <sup>b</sup> | D <sub>6</sub> -propylene<br>Computed <sup>a</sup> | D <sub>6</sub> -propylene<br>Ar, 3.5 K <sup>b</sup> | Assignment                                |
|------|------------------------------------|-------------------------------------|----------------------------------------------------|-----------------------------------------------------|-------------------------------------------|
| 1    | 3213 (16.9)                        | -                                   | 2393 (8.1)                                         | -                                                   | C–H (CH <sub>2</sub> )<br>stretching      |
| 2    | 3132 (2.7)                         | -                                   | 2320 (5.3)                                         | -                                                   | C–H (CH)<br>stretching                    |
| 3    | 3126 (30.5)                        | -                                   | 2294 (10.4)                                        | -                                                   | C–H (CH <sub>3</sub> )<br>stretching      |
| 4    | 3094 (10.3)                        | -                                   | 2278 (4.8)                                         | -                                                   | C–H (CH <sub>2</sub> )<br>asym.stretching |
| 5    | 3017 (24.4)                        | -                                   | 2169 (10.3)                                        | -                                                   | C–H (CH <sub>3</sub> )<br>asym.stretching |
| 6    | 1712 (15.2)                        | 1709 (w)                            | 1639 (16.5)                                        | 1625 (m)                                            | C=C stretching                            |
| 7    | 1494 (15.2)                        | 1453 (m)                            | 1183 (2.5)                                         | 1051 (w)                                            | C–C bending                               |
| 8    | 1479 (7.4)                         | 1440 (w)                            | 1078 (0.6)                                         | -                                                   | C–H (CH <sub>3</sub> )<br>wagging         |
| 9    | 1453 (0.9)                         | -                                   | 1070 (7.3)                                         | -                                                   | C–H (CH <sub>3</sub> )<br>bending         |
| 10   | 1410 (2.0)                         | -                                   | 1066 (3.8)                                         | -                                                   | C–H (CH <sub>3</sub> )<br>twisting        |
| 11   | 1332 (0.0)                         | -                                   | 1037 (0.8)                                         | -                                                   | C–C bending in pl.                        |
| 12   | 1194 (0.3)                         | -                                   | 949 (0.0)                                          | -                                                   | C–C bending in pl.                        |
| 13   | 1074 (2.6)                         | -                                   | 895 (0.9)                                          | -                                                   | C–C wagging                               |
| 14   | 1027 (11.3)                        | 1000 (w)                            | 785 (2.0)                                          | -                                                   | C–C wagging in pl.                        |
| 15   | 951 (3.1)                          | -                                   | 756 (7.9)                                          | -                                                   | C=C wagging                               |
| 16   | 946 (48.7)                         | 910 (s)                             | 732 (28.1)                                         | 715 (s)                                             | C=C in pl. def.                           |
| 17   | 925 (3.2)                          | -                                   | 706 (1.5)                                          | -                                                   | C–C in pl. def.                           |
| 18   | 592 (12.9)                         | -                                   | 443 (7.6)                                          | -                                                   | C–H in pl. def.                           |
| 19   | 426 (1.0)                          | -                                   | 349 (0.7)                                          | -                                                   | C–C rocking                               |
| 20   | 206 (0.5)                          | -                                   | 152 (0.2)                                          | -                                                   | C–CH <sub>3</sub> twisting                |

<sup>a</sup> B3LYP/def2-TZVP, harmonic approximation, unscaled frequencies, intensities (in parentheses) in km mol<sup>-1</sup>. <sup>b</sup> Experiment: argon matrix, 3.5 K; approximate relative intensities (w: weak, m: medium, s: strong).

## References

1. M. J. Frisch, G. W. T., H. B. Schlegel, G. E. Scuseria, M. A. Robb, J. R. Cheeseman, G. Scalmani,; V. Barone, G. A. P., H. Nakatsuji, X. Li, M. Caricato, A. V. Marenich, J. Bloino, B. G. Janesko,; R. Gomperts, B. M., H. P. Hratchian, J. V. Ortiz, A. F. Izmaylov, J. L. Sonnenberg, Williams, F.; Ding, F. L., F. Egidi, J. Goings, B. Peng, A. Petrone, T. Henderson, D. Ranasinghe, V. G.; Zakrzewski, J. G., N. Rega, G. Zheng, W. Liang, M. Hada, M. Ehara, K. Toyota, R. Fukuda, J.; Hasegawa, M. I., T. Nakajima, Y. Honda, O. Kitao, H. Nakai, T. Vreven, K. Throssell, J. A.; Montgomery Jr., J. E. P., F. Ogliaro, M. J. Bearpark, J. J. Heyd, E. N. Brothers, K. N. Kudin, V.; N. Staroverov, T. A. K., R. Kobayashi, J. Normand, K. Raghavachari, A. P. Rendell, J. C. Burant, S.; S. Iyengar, J. T., M. Cossi, J. M. Millam, M. Klene, C. Adamo, R. Cammi, J. W. Ochterski, R. L.; Martin, K. M., O. Farkas, J. B. Foresman, D. J. Fox,, Gaussian 16, revision C. 01. Gaussian, Inc., Wallingford CT: 2016.
2. Becke, A. D., Density-functional exchange-energy approximation with correct asymptotic behavior. *Phys. Rev. A.* **1988**, *38* (6), 3098.
3. Becke, A., Density-Functional Thermochemistry. III. The Role of Exact Exchange. *J. Chem. Phys.*, **98**: 5648-5652. 1993.

**Optimized structures** (distances in Å), electronic energies (in hartree) and zero-point vibrational energies (ZPVE, in hartree).

**3c:** Isobutyric acid *cis* ( $C_1$ )

|   |              |              |              |
|---|--------------|--------------|--------------|
| O | 1.685683000  | 0.693024000  | -0.493444000 |
| C | 0.782312000  | -0.191651000 | -0.001543000 |
| C | -0.635279000 | 0.177990000  | -0.390541000 |
| C | -1.560301000 | -1.034017000 | -0.315548000 |
| C | -1.119963000 | 1.330275000  | 0.508048000  |
| O | 1.110922000  | -1.128699000 | 0.678671000  |
| H | 2.557789000  | 0.412666000  | -0.173703000 |
| H | -0.592946000 | 0.548807000  | -1.418263000 |
| H | -2.571321000 | -0.750589000 | -0.612999000 |
| H | -1.596607000 | -1.432174000 | 0.698767000  |
| H | -1.222493000 | -1.835315000 | -0.973754000 |
| H | -2.126035000 | 1.631526000  | 0.212320000  |
| H | -0.466526000 | 2.199285000  | 0.430238000  |
| H | -1.155313000 | 1.015611000  | 1.553087000  |

E (DLPNO-CCSD(T)) = -307.230737

ZPVE (B3LYP) = 0.118390

**3t:** Isobutyric acid *trans* ( $C_1$ )

|   |              |              |              |
|---|--------------|--------------|--------------|
| O | 1.799384000  | 0.602644000  | -0.420963000 |
| C | 0.802388000  | -0.215636000 | 0.016378000  |
| C | -0.612032000 | 0.194275000  | -0.385712000 |
| C | -1.554116000 | -1.006741000 | -0.368961000 |
| C | -1.099151000 | 1.314419000  | 0.551660000  |
| O | 1.071656000  | -1.161327000 | 0.699016000  |
| H | 1.442386000  | 1.303853000  | -0.980495000 |
| H | -0.568534000 | 0.595544000  | -1.405466000 |
| H | -2.560419000 | -0.699558000 | -0.659007000 |
| H | -1.596649000 | -1.444491000 | 0.628224000  |
| H | -1.219910000 | -1.783561000 | -1.057265000 |
| H | -2.098155000 | 1.639750000  | 0.257841000  |
| H | -0.442099000 | 2.185935000  | 0.530931000  |
| H | -1.147480000 | 0.954092000  | 1.580625000  |

E (DLPNO-CCSD(T)) = -307.2223619

ZPVE (B3LYP) = 0.118067

**2ct:** Enol *cis, anti* ( $C_1$ )

|   |              |              |              |
|---|--------------|--------------|--------------|
| O | -1.508315000 | 1.093946000  | 0.011103000  |
| C | -0.690825000 | -0.004619000 | -0.005080000 |
| O | -1.444126000 | -1.132906000 | -0.052473000 |
| C | 0.644413000  | -0.015046000 | 0.002057000  |
| C | 1.410767000  | -1.307821000 | 0.031606000  |
| H | -0.984555000 | 1.883894000  | 0.182898000  |
| H | -2.356186000 | -0.887803000 | 0.146113000  |
| H | 0.751541000  | -2.169531000 | 0.110793000  |
| H | 2.103729000  | -1.331804000 | 0.880058000  |
| H | 2.017413000  | -1.429482000 | -0.872876000 |
| C | 1.464943000  | 1.244610000  | -0.027204000 |
| H | 2.027358000  | 1.382711000  | 0.903064000  |
| H | 2.201998000  | 1.205826000  | -0.836105000 |
| H | 0.882435000  | 2.155128000  | -0.191256000 |

E (DLPNO-CCSD(T)) = -307.186736

ZPVE (B3LYP) = 0.116370

**2cc:** Enol *cis, cis* ( $C_2$ )

|   |              |              |              |
|---|--------------|--------------|--------------|
| O | 1.145797034  | -0.078693664 | 1.366008130  |
| C | 0.000000000  | 0.000000000  | 0.612850130  |
| O | -1.145797034 | 0.078693664  | 1.366008130  |
| C | 0.000000000  | 0.000000000  | -0.718624870 |
| C | -1.255219462 | 0.244533057  | -1.505942370 |
| H | 1.012874917  | -0.737290125 | 2.061427630  |
| H | -1.012874917 | 0.737290125  | 2.061427630  |
| H | -2.104214586 | 0.469695653  | -0.864420370 |
| H | -1.510771363 | -0.630789217 | -2.112497370 |
| H | -1.115994359 | 1.077461722  | -2.203325370 |
| C | 1.255219462  | -0.244533057 | -1.505942370 |
| H | 1.115994359  | -1.077461722 | -2.203325370 |
| H | 1.510771363  | 0.630789217  | -2.112497370 |
| H | 2.104214586  | -0.469695653 | -0.864420370 |

E (DLPNO-CCSD(T)) = -307.185573

ZPVE (B3LYP) = 0.116715

**2tt:** Enol *trans*, *trans* ( $C_2$ )

|   |              |              |              |
|---|--------------|--------------|--------------|
| O | 1.083337877  | 0.118302648  | 1.438962043  |
| C | 0.000000000  | 0.000000000  | 0.631802043  |
| O | -1.083337877 | -0.118302648 | 1.438962043  |
| C | 0.000000000  | 0.000000000  | -0.709538957 |
| C | -1.270548116 | -0.056891521 | -1.515004457 |
| H | 1.842631870  | 0.382452339  | 0.909460543  |
| H | -1.842631870 | -0.382452339 | 0.909460543  |
| H | -1.263390461 | 0.708390396  | -2.298029457 |
| H | -2.173104387 | 0.124970314  | -0.926557457 |
| H | -1.396130499 | -1.021446915 | -2.020540457 |
| C | 1.270548116  | 0.056891521  | -1.515004457 |
| H | 2.173104387  | -0.124970314 | -0.926557457 |
| H | 1.263390461  | -0.708390396 | -2.298029457 |
| H | 1.396130499  | 1.021446915  | -2.020540457 |

E (DLPNO-CCSD(T)) = -307.183604

ZPVE (B3LYP) = 0.116663 kcal mol<sup>-1</sup>

**4:** Ketene ( $C_{2v}$ )

|   |              |              |              |
|---|--------------|--------------|--------------|
| C | 0.000000000  | 1.303947000  | 1.207449284  |
| C | 0.000000000  | 0.000000000  | 0.444917784  |
| C | 0.000000000  | -1.303947000 | 1.207449284  |
| C | 0.000000000  | 0.000000000  | -0.864729216 |
| O | 0.000000000  | 0.000000000  | -2.031687216 |
| H | 0.882896500  | 1.374534250  | 1.850274534  |
| H | -0.882896500 | 1.374534250  | 1.850274534  |
| H | 0.000000000  | 2.168505001  | 0.544041283  |
| H | 0.882896500  | -1.374534250 | 1.850274534  |
| H | 0.000000000  | -2.168505001 | 0.544041283  |
| H | -0.882896500 | -1.374534250 | 1.850274534  |

E (DLPNO-CCSD(T)) = -307.172230

ZPVE (B3LYP) = 0.089243

**5: Propene (C<sub>s</sub>)**

|   |              |              |              |
|---|--------------|--------------|--------------|
| C | -1.172646274 | 0.483148701  | 0.000000000  |
| C | -0.006803447 | -0.455238205 | 0.000000000  |
| C | 1.270016044  | -0.093251064 | 0.000000000  |
| H | -0.848607147 | 1.524897648  | 0.000000000  |
| H | -1.806445605 | 0.321390543  | 0.877046000  |
| H | -1.806445605 | 0.321390543  | -0.877046000 |
| H | -0.249314836 | -1.515201687 | 0.000000000  |
| H | 1.564688620  | 0.950639136  | 0.000000000  |
| H | 2.067766839  | -0.825117202 | 0.000000000  |

E (DLPNO-CCSD(T)) = -117.681381

ZPVE (B3LYP) = 0.075155

**6: Dimethylcarbene (C<sub>s</sub>)**

|   |              |              |              |
|---|--------------|--------------|--------------|
| C | -1.221051000 | 0.155619000  | 0.020527000  |
| C | 0.000001000  | -0.656296000 | -0.000001000 |
| C | 1.221050000  | 0.155617000  | -0.020527000 |
| H | -1.459861000 | 0.153089000  | -1.061157000 |
| H | -1.133138000 | 1.212050000  | 0.322672000  |
| H | -2.073059000 | -0.329963000 | 0.498358000  |
| H | 1.133141000  | 1.212047000  | -0.322684000 |
| H | 2.073069000  | -0.329962000 | -0.498340000 |
| H | 1.459842000  | 0.153102000  | 1.061162000  |

E (DLPNO-CCSD(T)) = -117.570761

ZPVE (B3LYP) = 0.075155

**TS1: Enol rotation 2ct – 2tt (C<sub>1</sub>)**

|   |              |              |              |
|---|--------------|--------------|--------------|
| O | -1.493194000 | 1.136410000  | -0.030097000 |
| C | -0.710174000 | 0.018056000  | -0.007454000 |
| O | -1.508419000 | -1.090671000 | -0.051178000 |
| C | 0.626602000  | -0.016539000 | 0.005252000  |
| C | 1.381235000  | -1.315423000 | -0.051813000 |
| H | -0.941485000 | 1.911038000  | -0.185962000 |
| H | -1.572060000 | -1.488623000 | 0.824003000  |



|   |             |              |              |
|---|-------------|--------------|--------------|
| H | 0.721355000 | -2.163281000 | -0.223998000 |
| H | 1.939792000 | -1.495939000 | 0.873842000  |
| H | 2.118911000 | -1.296880000 | -0.861136000 |
| C | 1.469861000 | 1.229311000  | 0.054461000  |
| H | 2.266371000 | 1.121805000  | 0.796857000  |
| H | 1.960331000 | 1.424388000  | -0.905686000 |
| H | 0.914542000 | 2.129145000  | 0.329596000  |

E (DLPNO-CCSD(T)) = -307.181066

ZPVE (B3LYP) = 0.115846

**TS2: Enol rotation 2ct – 2cc (C<sub>1</sub>)**

|   |              |              |              |
|---|--------------|--------------|--------------|
| O | -1.415811000 | 1.160018000  | -0.086153000 |
| C | -0.684254000 | -0.000001000 | 0.007492000  |
| O | -1.415810000 | -1.160020000 | -0.086152000 |
| C | 0.648416000  | -0.000001000 | 0.026197000  |
| C | 1.437315000  | -1.277619000 | 0.009714000  |
| H | -2.167573000 | 1.140555000  | 0.518393000  |
| H | -2.167586000 | -1.140546000 | 0.518377000  |
| H | 0.798698000  | -2.156231000 | 0.061748000  |
| H | 2.137551000  | -1.306913000 | 0.851026000  |
| H | 2.041455000  | -1.350123000 | -0.901289000 |
| C | 1.437312000  | 1.277621000  | 0.009714000  |
| H | 2.137577000  | 1.306898000  | 0.851001000  |
| H | 2.041421000  | 1.350146000  | -0.901309000 |
| H | 0.798694000  | 2.156229000  | 0.061788000  |

E (DLPNO-CCSD(T)) = -307.179609

ZPVE (B3LYP) = 0.115682

**TS3: Enol 2tt – isobutyric acid 3t (C<sub>1</sub>)**

|   |              |              |              |
|---|--------------|--------------|--------------|
| O | -1.415726000 | -1.037487000 | -0.511741000 |
| C | -0.799641000 | -0.033657000 | -0.008913000 |
| O | -1.526312000 | 0.933390000  | 0.528953000  |
| C | 0.607322000  | -0.079870000 | -0.258166000 |
| C | 1.348678000  | 1.232486000  | -0.399359000 |
| H | -0.287064000 | -1.077002000 | -1.046093000 |
| H | -0.944120000 | 1.567697000  | 0.970179000  |
| H | 0.788541000  | 1.967570000  | -0.981802000 |

|   |             |              |              |
|---|-------------|--------------|--------------|
| H | 2.297177000 | 1.073861000  | -0.916331000 |
| H | 1.604214000 | 1.688059000  | 0.571709000  |
| C | 1.388415000 | -1.142814000 | 0.518578000  |
| H | 0.803637000 | -2.047023000 | 0.689885000  |
| H | 2.284554000 | -1.430083000 | -0.035085000 |
| H | 1.720719000 | -0.767178000 | 1.497006000  |

E (DLPNO-CCSD(T)) = -307.102606

ZPVE (B3LYP) = 0.112009

**TS4:** Enol **2ct** – isobutyric acid **3c** ( $C_1$ )

|   |              |              |              |
|---|--------------|--------------|--------------|
| O | 1.367934000  | 1.071542000  | -0.488095000 |
| C | 0.772672000  | 0.036688000  | 0.011466000  |
| O | 1.485670000  | -0.947412000 | 0.534180000  |
| C | -0.623709000 | 0.032075000  | -0.219795000 |
| C | -1.346357000 | -1.290439000 | -0.334846000 |
| H | 0.234045000  | 1.033352000  | -1.038384000 |
| H | 2.424169000  | -0.788926000 | 0.346574000  |
| H | -1.672873000 | -1.671697000 | 0.641798000  |
| H | -0.727959000 | -2.057975000 | -0.801832000 |
| H | -2.244046000 | -1.173168000 | -0.946405000 |
| C | -1.442922000 | 1.129542000  | 0.462144000  |
| H | -0.873834000 | 2.047196000  | 0.612463000  |
| H | -2.320038000 | 1.377455000  | -0.139057000 |
| H | -1.806396000 | 0.793527000  | 1.442345000  |

E (DLPNO-CCSD(T)) = -307.105018

ZPVE (B3LYP) = 0.112018

**TS5:** Enol **2ct** – ketene (**4**) – H<sub>2</sub>O elimination ( $C_1$ )

|   |              |              |              |
|---|--------------|--------------|--------------|
| O | 1.687909000  | 0.895317000  | -0.052184000 |
| C | 0.577958000  | -0.276418000 | -0.017554000 |
| O | 1.408743000  | -1.242808000 | -0.033075000 |
| C | -0.712885000 | 0.028075000  | 0.000334000  |
| C | -1.700044000 | -1.110965000 | 0.042176000  |
| H | 1.721343000  | 1.354225000  | 0.801659000  |
| H | 2.200653000  | -0.150406000 | -0.017299000 |
| H | -2.349263000 | -1.032453000 | 0.920581000  |
| H | -1.199001000 | -2.077252000 | 0.076448000  |

|   |              |              |              |
|---|--------------|--------------|--------------|
| H | -2.348707000 | -1.095923000 | -0.839986000 |
| C | -1.256797000 | 1.425978000  | -0.040129000 |
| H | -1.944322000 | 1.547964000  | -0.883796000 |
| H | -1.829125000 | 1.657929000  | 0.865121000  |
| H | -0.474195000 | 2.175822000  | -0.149614000 |

E (DLPNO-CCSD(T)) = -307.111571

ZPVE (B3LYP) = 0.111146

**TS6:** Ketene [1,2]H-shift ( $C_1$ )

|   |              |              |              |
|---|--------------|--------------|--------------|
| C | -0.980759000 | 1.338604000  | 0.073653000  |
| C | -0.377696000 | -0.045571000 | -0.148201000 |
| C | -1.281453000 | -1.264800000 | 0.215773000  |
| C | 0.978031000  | -0.065052000 | -0.103101000 |
| O | 2.125210000  | -0.078988000 | 0.077063000  |
| H | -1.233522000 | 1.443232000  | 1.129553000  |
| H | -1.900543000 | 1.419494000  | -0.505347000 |
| H | -0.312552000 | 2.143782000  | -0.235047000 |
| H | -0.754709000 | -2.211757000 | 0.290383000  |
| H | -0.659043000 | -0.636289000 | -1.111100000 |
| H | -2.170047000 | -1.305647000 | -0.413690000 |

E (DLPNO-CCSD(T)) = -230.688644

ZPVE (B3LYP) = 0.082933

**TS7:** Singlet Carbene [1,2]H-shift ( $C_1$ )

|   |              |              |              |
|---|--------------|--------------|--------------|
| C | 1.214734000  | -0.205807000 | -0.037254000 |
| C | 0.081142000  | 0.591727000  | -0.116676000 |
| C | -1.217209000 | -0.139433000 | 0.016036000  |
| H | 2.202590000  | 0.227026000  | -0.185592000 |
| H | 1.192317000  | -1.305363000 | 0.035195000  |
| H | 0.877623000  | 0.505813000  | 0.953447000  |
| H | -1.147309000 | -1.213400000 | 0.253269000  |
| H | -1.712071000 | -0.042422000 | -0.956458000 |
| H | -1.885155000 | 0.349424000  | 0.727501000  |

E (DLPNO-CCSD(T)) = -117.558509

ZPVE (B3LYP) = 0.073481
